# Supplementary material
Source: HighWire-hosted journal article supplement (http://www.cmaj.ca/highwire/filestream/59961/field_highwire_adjunct_files/1/161481-res-2-at.pdf)
Supplement: 161481-res-2-at.pdf [file 161481-res-2-at.pdf]

## APPENDIX 2 (as supplied by the authors): Findings by therapeutic category

| Table B1: Level and drivers of differences in estimated 2015 expenditure per capita in each country compared to the other nine comparator countries combined, hypertension treatments                                                                                                                                                                              |                 |                            |             |             |             |             |                                      |             |             |             |
|--------------------------------------------------------------------------------------------------------------------------------------------------------------------------------------------------------------------------------------------------------------------------------------------------------------------------------------------------------------------|-----------------|----------------------------|-------------|-------------|-------------|-------------|--------------------------------------|-------------|-------------|-------------|
|                                                                                                                                                                                                                                                                                                                                                                    | Mixed financing | Universal public financing |             |             |             |             | Universal social insurance financing |             |             |             |
|                                                                                                                                                                                                                                                                                                                                                                    | Canada          | Australia                  | New Zealand | Norway      | Sweden      | UK          | France                               | Germany     | Netherlands | Switzerland |
| Domestic expenditure                                                                                                                                                                                                                                                                                                                                               | \$37.9          | \$20.4                     | \$7.2       | \$14.7      | \$11.6      | \$16.2      | \$31.0                               | \$27.5      | \$11.9      | \$44.9      |
| Comparator expenditure                                                                                                                                                                                                                                                                                                                                             | \$23.6          | \$25.6                     | \$25.5      | \$25.4      | \$25.6      | \$27.5      | \$23.6                               | \$24.4      | \$25.9      | \$24.7      |
| <b>Total difference in expenditure per capita</b>                                                                                                                                                                                                                                                                                                                  | <b>61%</b>      | <b>-20%</b>                | <b>-72%</b> | <b>-42%</b> | <b>-55%</b> | <b>-41%</b> | <b>31%</b>                           | <b>13%</b>  | <b>-54%</b> | <b>82%</b>  |
| Domestic days per capita                                                                                                                                                                                                                                                                                                                                           | 103             | 86                         | 104         | 91          | 124         | 113         | 106                                  | 158         | 112         | 91          |
| Comparator days per capita                                                                                                                                                                                                                                                                                                                                         | 121             | 122                        | 119         | 120         | 119         | 121         | 123                                  | 106         | 120         | 120         |
| <b>Difference in volume of therapy</b>                                                                                                                                                                                                                                                                                                                             | <b>-15%</b>     | <b>-30%</b>                | <b>-13%</b> | <b>-24%</b> | <b>4%</b>   | <b>-7%</b>  | <b>-13%</b>                          | <b>50%</b>  | <b>-6%</b>  | <b>-24%</b> |
| <b>Difference in cost per day of therapy</b>                                                                                                                                                                                                                                                                                                                       | <b>75%</b>      | <b>9%</b>                  | <b>-59%</b> | <b>-18%</b> | <b>-59%</b> | <b>-34%</b> | <b>44%</b>                           | <b>-37%</b> | <b>-48%</b> | <b>106%</b> |
| <b>Difference in expenditure per capita resulting from differences in drivers of cost per day of therapy</b>                                                                                                                                                                                                                                                       |                 |                            |             |             |             |             |                                      |             |             |             |
| Broad mix of therapies                                                                                                                                                                                                                                                                                                                                             | -1%             | 8%                         | -14%        | 4%          | -17%        | -20%        | 12%                                  | 5%          | -10%        | 13%         |
| Narrow mix of therapies                                                                                                                                                                                                                                                                                                                                            | -2%             | 4%                         | -8%         | -11%        | -27%        | -18%        | 23%                                  | -21%        | -1%         | 26%         |
| <b>Choice Effects - subtotal</b>                                                                                                                                                                                                                                                                                                                                   | <b>-3%</b>      | <b>12%</b>                 | <b>-22%</b> | <b>-7%</b>  | <b>-43%</b> | <b>-38%</b> | <b>34%</b>                           | <b>-16%</b> | <b>-11%</b> | <b>40%</b>  |
| Generic use                                                                                                                                                                                                                                                                                                                                                        | 1%              | 10%                        | -3%         | 8%          | 3%          | -5%         | 4%                                   | -9%         | -12%        | 14%         |
| Prices                                                                                                                                                                                                                                                                                                                                                             | 78%             | -13%                       | -34%        | -19%        | -18%        | 8%          | 6%                                   | -12%        | -25%        | 52%         |
| <b>Price Effects - subtotal</b>                                                                                                                                                                                                                                                                                                                                    | <b>79%</b>      | <b>-3%</b>                 | <b>-37%</b> | <b>-11%</b> | <b>-16%</b> | <b>4%</b>   | <b>10%</b>                           | <b>-21%</b> | <b>-37%</b> | <b>66%</b>  |
| Note: Comparator for each country is the population-weighted sum of all nine other countries studied. Percentage figures for the drivers of cost per day of therapy depict how much higher or lower per capita expenditures are because of differences between the specific country's utilization or pricing patterns and those of the other comparator countries. |                 |                            |             |             |             |             |                                      |             |             |             |

Table B2: Level and drivers of differences in estimated 2015 expenditure per capita in each country compared to the other nine comparator countries combined, pain medications

|                                                                                                              | Mixed financing | Universal public financing |             |             |             |             | Universal social insurance financing |            |             |             |
|--------------------------------------------------------------------------------------------------------------|-----------------|----------------------------|-------------|-------------|-------------|-------------|--------------------------------------|------------|-------------|-------------|
|                                                                                                              | Canada          | Australia                  | New Zealand | Norway      | Sweden      | UK          | France                               | Germany    | Netherlands | Switzerland |
| Domestic expenditure                                                                                         | \$30.1          | \$22.3                     | \$6.7       | \$18.1      | \$18.9      | \$20.0      | \$18.0                               | \$31.1     | \$11.5      | \$35.0      |
| Comparator expenditure                                                                                       | \$22.6          | \$23.5                     | \$23.7      | \$23.5      | \$23.5      | \$24.3      | \$24.8                               | \$20.8     | \$24.1      | \$23.1      |
| <b>Total difference in expenditure per capita</b>                                                            | <b>33%</b>      | <b>-5%</b>                 | <b>-72%</b> | <b>-23%</b> | <b>-20%</b> | <b>-18%</b> | <b>-28%</b>                          | <b>50%</b> | <b>-52%</b> | <b>51%</b>  |
| Domestic days per capita                                                                                     | 20              | 21                         | 13          | 14          | 14          | 15          | 17                                   | 20         | 10          | 17          |
| Comparator days per capita                                                                                   | 17              | 17                         | 18          | 18          | 18          | 18          | 18                                   | 17         | 18          | 18          |
| <b>Difference in volume of therapy</b>                                                                       | <b>18%</b>      | <b>25%</b>                 | <b>-24%</b> | <b>-19%</b> | <b>-19%</b> | <b>-17%</b> | <b>-5%</b>                           | <b>21%</b> | <b>-42%</b> | <b>-3%</b>  |
| <b>Difference in cost per day of therapy</b>                                                                 | <b>16%</b>      | <b>-30%</b>                | <b>-48%</b> | <b>-4%</b>  | <b>0%</b>   | <b>-1%</b>  | <b>-23%</b>                          | <b>29%</b> | <b>-11%</b> | <b>54%</b>  |
| <b>Difference in expenditure per capita resulting from differences in drivers of cost per day of therapy</b> |                 |                            |             |             |             |             |                                      |            |             |             |
| Broad mix of therapies                                                                                       | 2%              | 8%                         | -6%         | 0%          | -23%        | -9%         | -38%                                 | 19%        | -6%         | 1%          |
| Narrow mix of therapies                                                                                      | -2%             | 2%                         | -21%        | -21%        | 18%         | -5%         | 17%                                  | -26%       | 2%          | 14%         |
| <b>Choice Effects - subtotal</b>                                                                             | <b>0%</b>       | <b>9%</b>                  | <b>-26%</b> | <b>-21%</b> | <b>-4%</b>  | <b>-14%</b> | <b>-21%</b>                          | <b>-7%</b> | <b>-4%</b>  | <b>16%</b>  |
| Generic use                                                                                                  | -6%             | 2%                         | -7%         | 20%         | 4%          | 5%          | 4%                                   | -4%        | -1%         | 7%          |
| Prices                                                                                                       | 22%             | -41%                       | -15%        | -3%         | 0%          | 8%          | -5%                                  | 39%        | -6%         | 31%         |
| <b>Price Effects - subtotal</b>                                                                              | <b>16%</b>      | <b>-39%</b>                | <b>-21%</b> | <b>17%</b>  | <b>4%</b>   | <b>13%</b>  | <b>-2%</b>                           | <b>36%</b> | <b>-7%</b>  | <b>38%</b>  |

Note: Comparator for each country is the population-weighted sum of all nine other countries studied. Percentage figures for the drivers of cost per day of therapy depict how much higher or lower per capita expenditures are because of differences between the specific country's utilization or pricing patterns and those of the other comparator countries.

Table B3: Level and drivers of differences in estimated 2015 expenditure per capita in each country compared to the other nine comparator countries combined, lipid lowering treatments

|                                                                                                              | Mixed financing | Universal public financing |             |             |             |             | Universal social insurance financing |             |             |             |
|--------------------------------------------------------------------------------------------------------------|-----------------|----------------------------|-------------|-------------|-------------|-------------|--------------------------------------|-------------|-------------|-------------|
|                                                                                                              | Canada          | Australia                  | New Zealand | Norway      | Sweden      | UK          | France                               | Germany     | Netherlands | Switzerland |
| Domestic expenditure                                                                                         | \$20.8          | \$18.7                     | \$3.2       | \$7.4       | \$5.6       | \$12.4      | \$18.7                               | \$6.7       | \$12.2      | \$28.0      |
| Comparator expenditure                                                                                       | \$12.8          | \$13.3                     | \$13.8      | \$13.8      | \$13.9      | \$14.0      | \$12.3                               | \$16.1      | \$13.8      | \$13.3      |
| <b>Total difference in expenditure per capita</b>                                                            | <b>63%</b>      | <b>41%</b>                 | <b>-77%</b> | <b>-47%</b> | <b>-60%</b> | <b>-11%</b> | <b>52%</b>                           | <b>-58%</b> | <b>-11%</b> | <b>111%</b> |
| Domestic days per capita                                                                                     | 42              | 36                         | 39          | 35          | 31          | 43          | 37                                   | 30          | 39          | 28          |
| Comparator days per capita                                                                                   | 36              | 36                         | 36          | 36          | 37          | 35          | 36                                   | 39          | 36          | 37          |
| <b>Difference in volume of therapy</b>                                                                       | <b>16%</b>      | <b>-1%</b>                 | <b>6%</b>   | <b>-4%</b>  | <b>-16%</b> | <b>22%</b>  | <b>2%</b>                            | <b>-23%</b> | <b>7%</b>   | <b>-24%</b> |
| <b>Difference in cost per day of therapy</b>                                                                 | <b>47%</b>      | <b>42%</b>                 | <b>-83%</b> | <b>-42%</b> | <b>-44%</b> | <b>-33%</b> | <b>50%</b>                           | <b>-35%</b> | <b>-19%</b> | <b>134%</b> |
| <b>Difference in expenditure per capita resulting from differences in drivers of cost per day of therapy</b> |                 |                            |             |             |             |             |                                      |             |             |             |
| Broad mix of therapies                                                                                       | -15%            | 14%                        | -6%         | -4%         | -8%         | -16%        | 15%                                  | 5%          | -1%         | 8%          |
| Narrow mix of therapies                                                                                      | 46%             | 37%                        | -20%        | -26%        | -26%        | -42%        | 26%                                  | -43%        | -13%        | 17%         |
| <b>Choice Effects - subtotal</b>                                                                             | <b>31%</b>      | <b>50%</b>                 | <b>-26%</b> | <b>-31%</b> | <b>-35%</b> | <b>-58%</b> | <b>40%</b>                           | <b>-39%</b> | <b>-14%</b> | <b>25%</b>  |
| Generic use                                                                                                  | -44%            | 12%                        | -4%         | 22%         | 4%          | 22%         | 14%                                  | 2%          | 10%         | 10%         |
| Prices                                                                                                       | 59%             | -20%                       | -53%        | -34%        | -14%        | 2%          | -5%                                  | 1%          | -15%        | 99%         |
| <b>Price Effects - subtotal</b>                                                                              | <b>15%</b>      | <b>-8%</b>                 | <b>-57%</b> | <b>-12%</b> | <b>-10%</b> | <b>25%</b>  | <b>10%</b>                           | <b>3%</b>   | <b>-5%</b>  | <b>110%</b> |

Note: Comparator for each country is the population-weighted sum of all nine other countries studied. Percentage figures for the drivers of cost per day of therapy depict how much higher or lower per capita expenditures are because of differences between the specific country's utilization or pricing patterns and those of the other comparator countries.

Table B4: Level and drivers of differences in estimated 2015 expenditure per capita in each country compared to the other nine comparator countries combined, non-insulin diabetes treatments

|                                                                                                              | Mixed financing | Universal public financing |             |             |             |             | Universal social insurance financing |             |             |             |
|--------------------------------------------------------------------------------------------------------------|-----------------|----------------------------|-------------|-------------|-------------|-------------|--------------------------------------|-------------|-------------|-------------|
|                                                                                                              | Canada          | Australia                  | New Zealand | Norway      | Sweden      | UK          | France                               | Germany     | Netherlands | Switzerland |
| Domestic expenditure                                                                                         | \$21.4          | \$7.9                      | \$0.7       | \$8.1       | \$6.9       | \$13.2      | \$14.6                               | \$13.9      | \$4.3       | \$16.3      |
| Comparator expenditure                                                                                       | \$12.4          | \$13.8                     | \$13.6      | \$13.5      | \$13.6      | \$13.4      | \$13.0                               | \$13.2      | \$13.9      | \$13.3      |
| <b>Total difference in expenditure per capita</b>                                                            | <b>73%</b>      | <b>-43%</b>                | <b>-95%</b> | <b>-40%</b> | <b>-49%</b> | <b>-1%</b>  | <b>12%</b>                           | <b>6%</b>   | <b>-69%</b> | <b>23%</b>  |
| Domestic days per capita                                                                                     | 26              | 16                         | 15          | 13          | 16          | 20          | 21                                   | 20          | 20          | 14          |
| Comparator days per capita                                                                                   | 19              | 20                         | 20          | 20          | 20          | 20          | 20                                   | 20          | 20          | 20          |
| <b>Difference in volume of therapy</b>                                                                       | <b>34%</b>      | <b>-19%</b>                | <b>-25%</b> | <b>-33%</b> | <b>-18%</b> | <b>1%</b>   | <b>4%</b>                            | <b>-3%</b>  | <b>0%</b>   | <b>-29%</b> |
| <b>Difference in cost per day of therapy</b>                                                                 | <b>39%</b>      | <b>-24%</b>                | <b>-70%</b> | <b>-7%</b>  | <b>-31%</b> | <b>-2%</b>  | <b>8%</b>                            | <b>9%</b>   | <b>-69%</b> | <b>52%</b>  |
| <b>Difference in expenditure per capita resulting from differences in drivers of cost per day of therapy</b> |                 |                            |             |             |             |             |                                      |             |             |             |
| Broad mix of therapies                                                                                       | -1%             | -1%                        | -7%         | -1%         | -1%         | 2%          | 0%                                   | -1%         | -2%         | -1%         |
| Narrow mix of therapies                                                                                      | -14%            | -13%                       | -43%        | 9%          | -20%        | -22%        | 9%                                   | 23%         | -37%        | 29%         |
| <b>Choice Effects - subtotal</b>                                                                             | <b>-15%</b>     | <b>-14%</b>                | <b>-51%</b> | <b>8%</b>   | <b>-21%</b> | <b>-20%</b> | <b>9%</b>                            | <b>22%</b>  | <b>-39%</b> | <b>28%</b>  |
| Generic use                                                                                                  | -2%             | 1%                         | -3%         | 1%          | -1%         | 2%          | 0%                                   | 9%          | -2%         | 3%          |
| Prices                                                                                                       | 56%             | -12%                       | -17%        | -16%        | -9%         | 17%         | -1%                                  | -22%        | -28%        | 20%         |
| <b>Price Effects - subtotal</b>                                                                              | <b>54%</b>      | <b>-10%</b>                | <b>-19%</b> | <b>-15%</b> | <b>-10%</b> | <b>18%</b>  | <b>-1%</b>                           | <b>-13%</b> | <b>-30%</b> | <b>24%</b>  |

Note: Comparator for each country is the population-weighted sum of all nine other countries studied. Percentage figures for the drivers of cost per day of therapy depict how much higher or lower per capita expenditures are because of differences between the specific country's utilization or pricing patterns and those of the other comparator countries.

Table B5: Level and drivers of differences in estimated 2015 expenditure per capita in each country compared to the other nine comparator countries combined, gastrointestinal preparations

|                                                                                                              | Mixed financing | Universal public financing |             |             |             |             | Universal social insurance financing |             |             |             |
|--------------------------------------------------------------------------------------------------------------|-----------------|----------------------------|-------------|-------------|-------------|-------------|--------------------------------------|-------------|-------------|-------------|
|                                                                                                              | Canada          | Australia                  | New Zealand | Norway      | Sweden      | UK          | France                               | Germany     | Netherlands | Switzerland |
| Domestic expenditure                                                                                         | \$22.7          | \$12.6                     | \$2.4       | \$5.7       | \$5.0       | \$7.3       | \$15.0                               | \$8.6       | \$4.2       | \$23.0      |
| Comparator expenditure                                                                                       | \$10.0          | \$11.4                     | \$11.6      | \$11.6      | \$11.7      | \$12.5      | \$10.5                               | \$12.5      | \$11.9      | \$11.2      |
| <b>Total difference in expenditure per capita</b>                                                            | <b>127%</b>     | <b>11%</b>                 | <b>-79%</b> | <b>-51%</b> | <b>-57%</b> | <b>-42%</b> | <b>42%</b>                           | <b>-31%</b> | <b>-65%</b> | <b>106%</b> |
| Domestic days per capita                                                                                     | 33              | 31                         | 30          | 23          | 26          | 41          | 37                                   | 32          | 39          | 30          |
| Comparator days per capita                                                                                   | 35              | 35                         | 35          | 35          | 35          | 33          | 34                                   | 36          | 34          | 35          |
| <b>Difference in volume of therapy</b>                                                                       | <b>-5%</b>      | <b>-12%</b>                | <b>-14%</b> | <b>-35%</b> | <b>-25%</b> | <b>23%</b>  | <b>7%</b>                            | <b>-12%</b> | <b>13%</b>  | <b>-13%</b> |
| <b>Difference in cost per day of therapy</b>                                                                 | <b>131%</b>     | <b>23%</b>                 | <b>-66%</b> | <b>-16%</b> | <b>-32%</b> | <b>-64%</b> | <b>35%</b>                           | <b>-20%</b> | <b>-77%</b> | <b>119%</b> |
| <b>Difference in expenditure per capita resulting from differences in drivers of cost per day of therapy</b> |                 |                            |             |             |             |             |                                      |             |             |             |
| Broad mix of therapies                                                                                       | 54%             | 19%                        | -13%        | -14%        | -7%         | -19%        | 45%                                  | -47%        | -20%        | 22%         |
| Narrow mix of therapies                                                                                      | -50%            | 4%                         | -14%        | 13%         | -10%        | -7%         | -21%                                 | 39%         | -11%        | -19%        |
| <b>Choice Effects - subtotal</b>                                                                             | <b>3%</b>       | <b>22%</b>                 | <b>-28%</b> | <b>-1%</b>  | <b>-16%</b> | <b>-26%</b> | <b>23%</b>                           | <b>-9%</b>  | <b>-30%</b> | <b>3%</b>   |
| Generic use                                                                                                  | -5%             | 21%                        | -4%         | 14%         | 1%          | -17%        | 4%                                   | -8%         | 0%          | 16%         |
| Prices                                                                                                       | 133%            | -20%                       | -34%        | -29%        | -16%        | -21%        | 7%                                   | -3%         | -47%        | 101%        |
| <b>Price Effects - subtotal</b>                                                                              | <b>128%</b>     | <b>1%</b>                  | <b>-38%</b> | <b>-15%</b> | <b>-16%</b> | <b>-38%</b> | <b>12%</b>                           | <b>-11%</b> | <b>-47%</b> | <b>117%</b> |

Note: Comparator for each country is the population-weighted sum of all nine other countries studied. Percentage figures for the drivers of cost per day of therapy depict how much higher or lower per capita expenditures are because of differences between the specific country's utilization or pricing patterns and those of the other comparator countries.

Table B6: Level and drivers of differences in estimated 2015 expenditure per capita in each country compared to the other nine comparator countries combined, antidepressants

|                                                                                                              | Mixed financing | Universal public financing |             |             |             |             | Universal social insurance financing |             |             |             |
|--------------------------------------------------------------------------------------------------------------|-----------------|----------------------------|-------------|-------------|-------------|-------------|--------------------------------------|-------------|-------------|-------------|
|                                                                                                              | Canada          | Australia                  | New Zealand | Norway      | Sweden      | UK          | France                               | Germany     | Netherlands | Switzerland |
| Domestic expenditure                                                                                         | \$24.8          | \$9.2                      | \$2.9       | \$4.7       | \$7.5       | \$11.4      | \$8.4                                | \$9.2       | \$4.6       | \$23.6      |
| Comparator expenditure                                                                                       | \$9.4           | \$11.3                     | \$11.3      | \$11.3      | \$11.3      | \$11.1      | \$11.9                               | \$11.8      | \$11.5      | \$10.8      |
| <b>Total difference in expenditure per capita</b>                                                            | <b>163%</b>     | <b>-19%</b>                | <b>-74%</b> | <b>-58%</b> | <b>-33%</b> | <b>3%</b>   | <b>-30%</b>                          | <b>-22%</b> | <b>-60%</b> | <b>118%</b> |
| Domestic days per capita                                                                                     | 35              | 32                         | 27          | 22          | 31          | 36          | 19                                   | 20          | 17          | 21          |
| Comparator days per capita                                                                                   | 25              | 25                         | 26          | 26          | 26          | 23          | 28                                   | 28          | 26          | 26          |
| <b>Difference in volume of therapy</b>                                                                       | <b>44%</b>      | <b>24%</b>                 | <b>3%</b>   | <b>-16%</b> | <b>21%</b>  | <b>52%</b>  | <b>-32%</b>                          | <b>-29%</b> | <b>-36%</b> | <b>-19%</b> |
| <b>Difference in cost per day of therapy</b>                                                                 | <b>119%</b>     | <b>-43%</b>                | <b>-77%</b> | <b>-42%</b> | <b>-54%</b> | <b>-49%</b> | <b>2%</b>                            | <b>6%</b>   | <b>-24%</b> | <b>137%</b> |
| <b>Difference in expenditure per capita resulting from differences in drivers of cost per day of therapy</b> |                 |                            |             |             |             |             |                                      |             |             |             |
| Broad mix of therapies                                                                                       | -1%             | -1%                        | -2%         | -2%         | -1%         | 0%          | 2%                                   | 0%          | -1%         | -1%         |
| Narrow mix of therapies                                                                                      | 53%             | 38%                        | -39%        | -18%        | -14%        | -55%        | 6%                                   | 4%          | -1%         | 19%         |
| <b>Choice Effects - subtotal</b>                                                                             | <b>52%</b>      | <b>37%</b>                 | <b>-41%</b> | <b>-20%</b> | <b>-15%</b> | <b>-55%</b> | <b>9%</b>                            | <b>4%</b>   | <b>-2%</b>  | <b>19%</b>  |
| Generic use                                                                                                  | -4%             | -3%                        | -19%        | 12%         | -10%        | 5%          | 4%                                   | -4%         | -3%         | 31%         |
| Prices                                                                                                       | 71%             | -77%                       | -18%        | -33%        | -29%        | 1%          | -10%                                 | 7%          | -19%        | 87%         |
| <b>Price Effects - subtotal</b>                                                                              | <b>67%</b>      | <b>-80%</b>                | <b>-36%</b> | <b>-22%</b> | <b>-39%</b> | <b>6%</b>   | <b>-7%</b>                           | <b>3%</b>   | <b>-22%</b> | <b>118%</b> |

Note: Comparator for each country is the population-weighted sum of all nine other countries studied. Percentage figures for the drivers of cost per day of therapy depict how much higher or lower per capita expenditures are because of differences between the specific country's utilization or pricing patterns and those of the other comparator countries.
